# Supplementary figures and images for: Microwave-assisted sidewall functionalization of single-wall carbon nanotubes by Diels–Alder cycloaddition
Source: Royal Society of Chemistry journal article supplement (doi:10.1039/b402375g), 2004-01-01

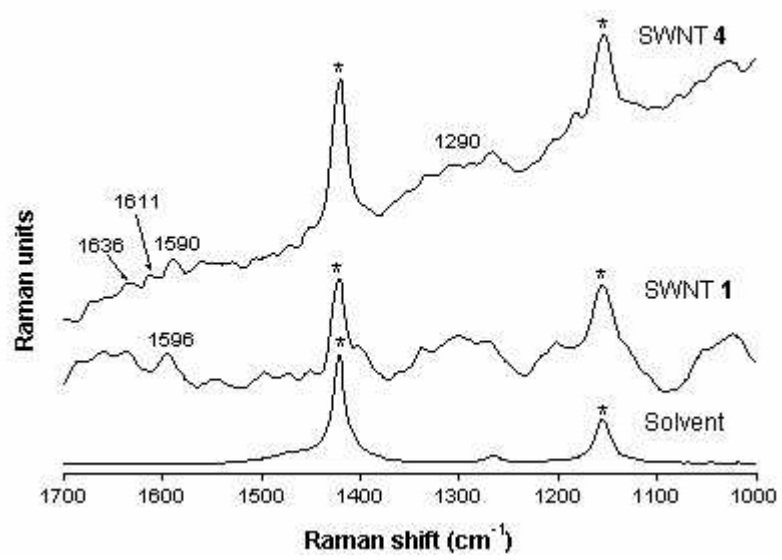

Supplement: b402375g.pdf [file b402375g.pdf]
